# Supplementary material for: Disturbance-Dependent Variation in Functional Redundancy Drives the Species Versus Functional Diversity Relationship across Spatial Scales and Vegetation Layers
Source: MDPI journal article supplement (doi:10.3390/f14020408), 2023-02-16
Supplement: s1 [file s1]

## Supporting Information (online only)

### For

Disturbance-dependent variation in functional redundancy drives the species versus functional diversity relationship across spatial scales and vegetation layers

Shekhar R. Biswas, Chaoqin Yin, Li Gong ,Yanxia Qing and Jialin Li

### Contents

|                                                                                                                                                                                                                                                                                    |                                     |
|------------------------------------------------------------------------------------------------------------------------------------------------------------------------------------------------------------------------------------------------------------------------------------|-------------------------------------|
| Figure S1: Trait-trait correlations among the measured traits in this study .....                                                                                                                                                                                                  | 2                                   |
| Figure S2: Variations in functional composition (community-weighted mean of individual traits) concerning disturbance and vegetation layers. ....                                                                                                                                  | <b>Error! Bookmark not defined.</b> |
| Figure S3: Variations in functional composition (community-weighted mean of individual traits) concerning spatial scale and vegetation layers. ....                                                                                                                                | 4                                   |
| Table S1: List of species found in this study .....                                                                                                                                                                                                                                | 5                                   |
| Table S2: Results of mixed-effect models showing the effects of habitat disturbance and spatial scale on species and functional diversity relationships for woody, non-woody and woody + non-woody layers. Bold font represents statistical significance ( $\alpha = 0.05$ ). .... | 9                                   |

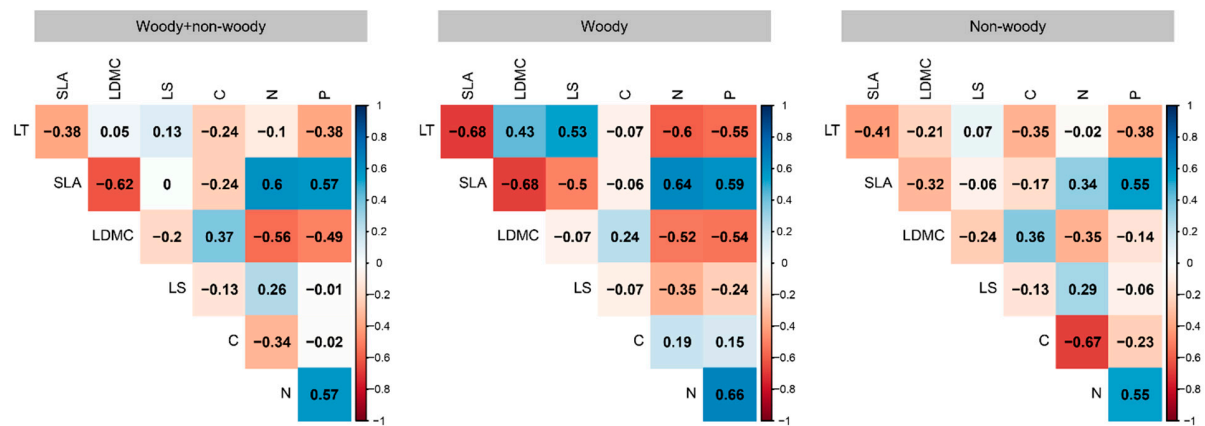

**Figure S1. Trait-trait correlations among the measured traits in this study.**

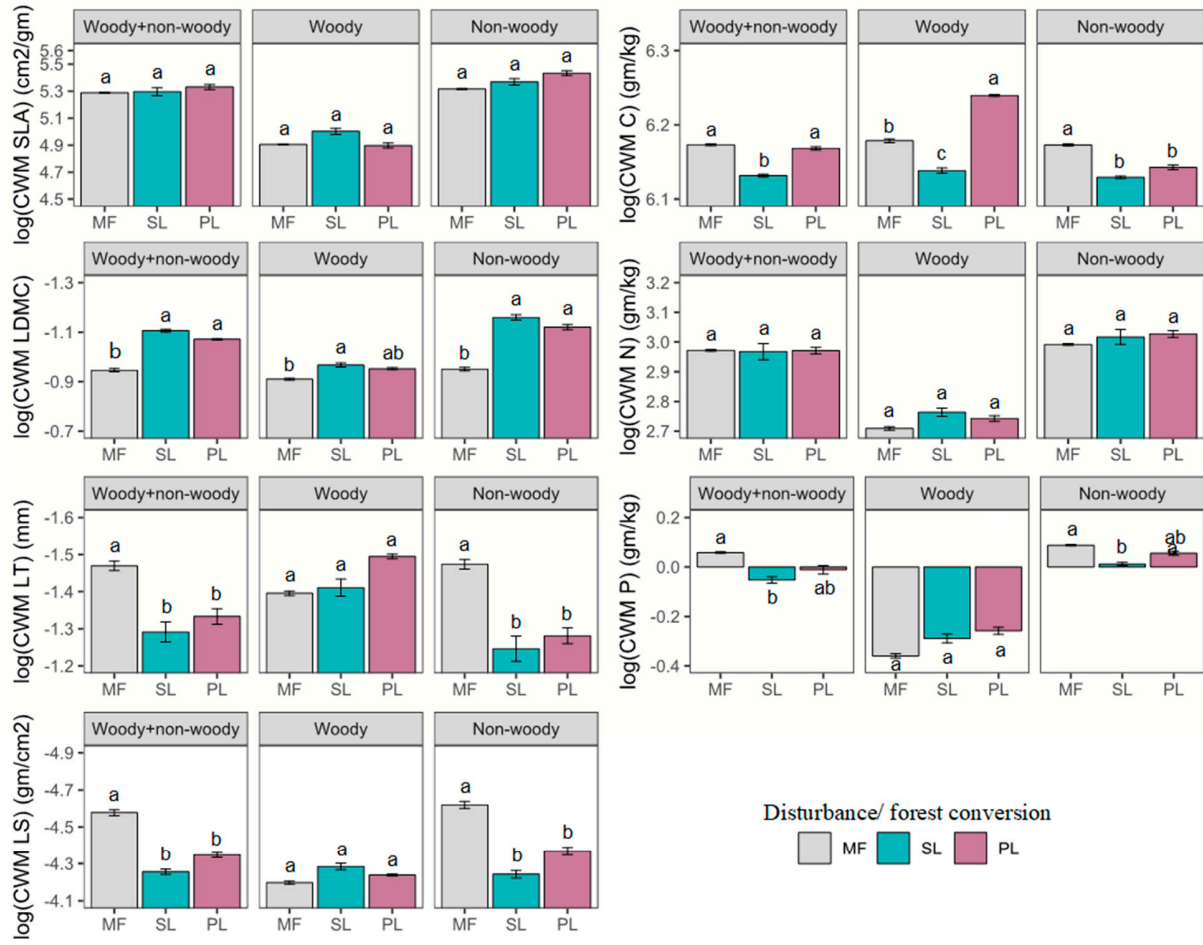

**Figure S2: Variations in functional composition (community-weighted mean of individual traits) concerning disturbance and vegetation layers. Shown in the figures are mean  $\pm$  1se. Bars marked with the same letters do not differ significantly at  $\alpha = 0.05$ , as identified by Tukey's posthoc test.**

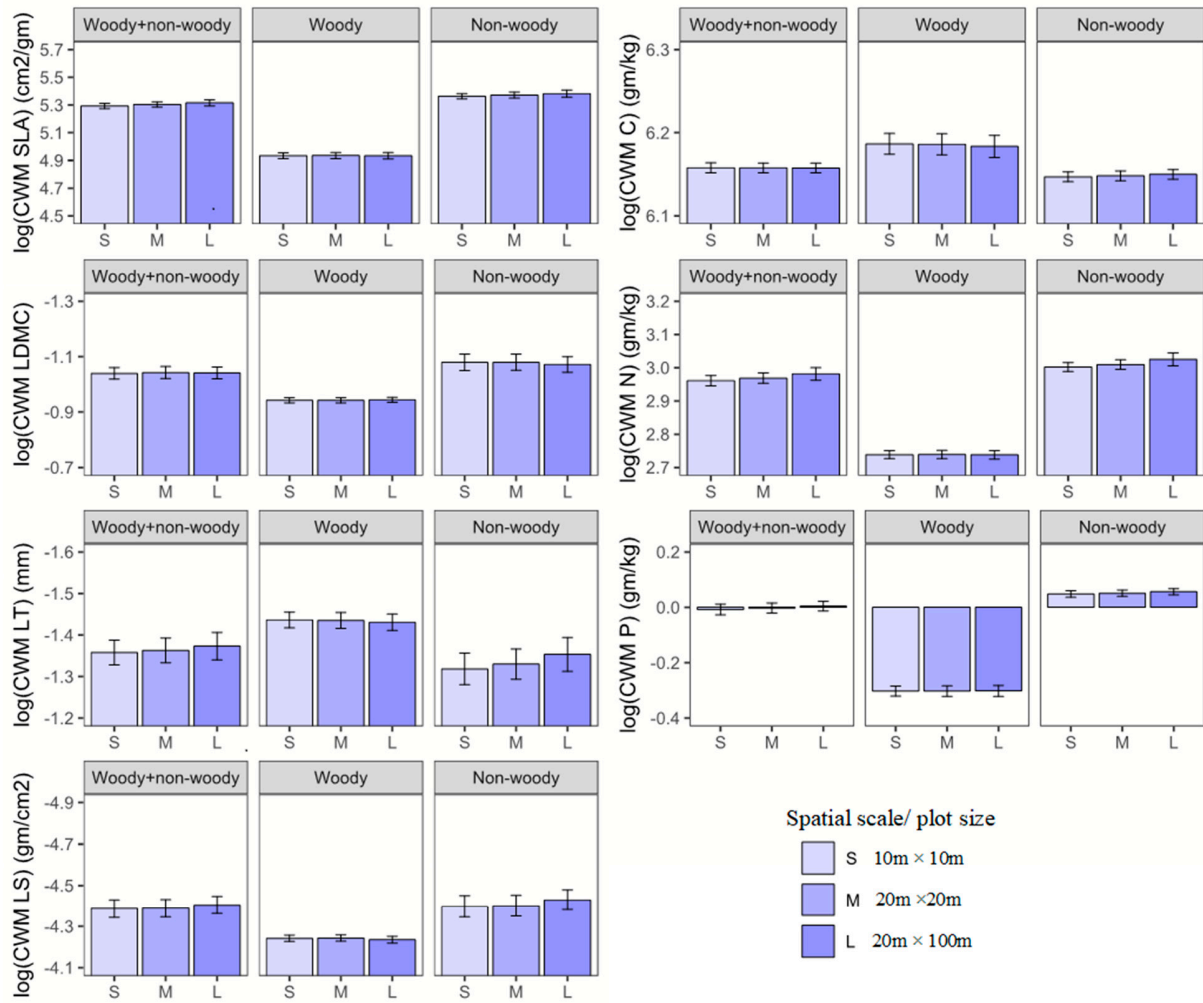

**Figure S3: Variations in functional composition (community-weighted mean of individual traits) concerning spatial scale and vegetation layers.** Shown in the figures are mean  $\pm$ 1 se.

**Table S1: List of species found in this study**

| Chinese name | Scientific name                     | Life form     |
|--------------|-------------------------------------|---------------|
| 三角槭          | <i>Acer buergerianum</i>            | Woody species |
| 秀丽槭          | <i>Acer elegantulum</i>             | Woody species |
| 毛脉槭          | <i>Acer pubinerve</i>               | Woody species |
| 杨桐           | <i>Adinandra millettii</i>          | Woody species |
| 合欢           | <i>Albizia julibrissin</i>          | Woody species |
| 山槐           | <i>Albizia kalkora</i>              | Woody species |
| 拟赤杨          | <i>Alniphyllum fortunei</i>         | Woody species |
| 毛柄连蕊茶        | <i>Camellia fraterna</i>            | Woody species |
| 油茶           | <i>Camellia oleifera</i>            | Woody species |
| 雷公鹅耳枥        | <i>Carpinus viminea</i>             | Woody species |
| 米槭           | <i>Castanopsis carlesii</i>         | Woody species |
| 栲            | <i>Castanopsis fargesii</i>         | Woody species |
| 苦槭           | <i>Castanopsis scerophylla</i>      | Woody species |
| 朴树           | <i>Celtis sinensis</i>              | Woody species |
| 迎春樱桃         | <i>Cerasus discoidea</i>            | Woody species |
| 大叶早樱         | <i>Cerasus subhirtella</i>          | Woody species |
| 南酸枣          | <i>Choerospondias axillaris</i>     | Woody species |
| 香樟           | <i>Cinnamomum camphora</i>          | Woody species |
| 细叶香桂         | <i>Cinnamomum subavenium</i>        | Woody species |
| 大青           | <i>Clerodendrum cyrtophyllum</i>    | Woody species |
| 赤皮青冈         | <i>Cyclobalanopsis gilva</i>        | Woody species |
| 小叶青冈         | <i>Cyclobalanopsis myrsinifolia</i> | Woody species |
| 云山青冈         | <i>Cyclobalanopsis sessilifolia</i> | Woody species |
| 褐叶青冈         | <i>Cyclobalanopsis stewardiana</i>  | Woody species |
| 黄檀           | <i>Dalbergia hupeana</i>            | Woody species |
| 虎皮楠          | <i>Daphniphyllum oldhami</i>        | Woody species |
| 柿子           | <i>Diospyros kaki</i>               | Woody species |
| 浙江柿          | <i>Diospyros montana</i>            | Woody species |
| 罗浮柿          | <i>Diospyros morrisiana</i>         | Woody species |
| 油柿           | <i>Diospyros oleifera</i>           | Woody species |
| 杨梅叶蚊母树       | <i>Distylium myricoides</i>         | Woody species |
| 厚壳树          | <i>Ehretia thyrsoiflora</i>         | Woody species |
| 日本杜英         | <i>Elaeocarpus japonicus</i>        | Woody species |
| 铁海棠          | <i>Euphorbia milii</i>              | Woody species |
| 细枝柃          | <i>Eurya loquaiana</i>              | Woody species |
| 格药柃          | <i>Eurya muricata</i>               | Woody species |

| Chinese name | Scientific name                   | Life form     |
|--------------|-----------------------------------|---------------|
| 窄基红褐桉        | <i>Eurya rubiginosa</i>           | Woody species |
| 野鸦椿          | <i>Euscaphis japonica</i>         | Woody species |
| 青桐           | <i>Firmiana platanifolia</i>      | Woody species |
| 牛鼻栓          | <i>Fortunearia sinensis</i>       | Woody species |
| 苦枥木          | <i>Fraxinus insularis</i>         | Woody species |
| 梔子花          | <i>Gardenia jasminoides</i>       | Woody species |
| 小果山龙眼        | <i>Helicia cochinchinensis</i>    | Woody species |
| 短梗冬青         | <i>Ilex buergeri</i>              | Woody species |
| 冬青           | <i>Ilex chinensis</i>             | Woody species |
| 毛枝冬青         | <i>Ilex dasyclada</i>             | Woody species |
| 皱柄冬青         | <i>Ilex kengii</i>                | Woody species |
| 小果冬青         | <i>Ilex micrococca</i>            | Woody species |
| 铁冬青          | <i>Ilex rotunda</i>               | Woody species |
| 披针叶茴香        | <i>Illicium lanceolatum</i>       | Woody species |
| 刺楸           | <i>Kalopanax septemlobus</i>      | Woody species |
| 刺叶桂樱         | <i>Laurocerasus spinulosa</i>     | Woody species |
| 水腊           | <i>Ligustrum obtusifolium</i>     | Woody species |
| 山胡椒          | <i>Lindera glauca</i>             | Woody species |
| 红脉钓樟         | <i>Lindera rubronervia</i> Gamble | Woody species |
| 枫香树          | <i>Liquidambar formosana</i>      | Woody species |
| 石栎           | <i>Lithocarpus glaber</i>         | Woody species |
| 东南石栎         | <i>Lithocarpus harlandii</i>      | Woody species |
| 山鸡椒          | <i>Litsea cubeba</i>              | Woody species |
| 黄丹木姜子        | <i>Litsea elongata</i>            | Woody species |
| 欒木           | <i>Loropetalum chinense</i>       | Woody species |
| 红楠           | <i>Machilus thunbergii</i>        | Woody species |
| 野桐           | <i>Mallotus japonicus</i>         | Woody species |
| 深山含笑         | <i>Michelia maudiae</i>           | Woody species |
| 杨梅           | <i>Myrica rubra</i>               | Woody species |
| 浙江新木姜子       | <i>Neolitsea aurata</i>           | Woody species |
| 宁波木犀         | <i>Osmanthus cooperi</i>          | Woody species |
| 桂花           | <i>Osmanthus fragrans</i>         | Woody species |
| 光叶石楠         | <i>Photinia glabra</i>            | Woody species |
| 小叶石楠         | <i>Photinia parvifolia</i>        | Woody species |
| 海金子          | <i>Pittosporum illicioides</i>    | Woody species |
| 化香           | <i>Platycarya strobilacea</i>     | Woody species |
| 豆腐柴          | <i>Premna microphylla</i>         | Woody species |
| 桂樱           | <i>Prunus laurocerasus</i>        | Woody species |
| 麻栎           | <i>Quercus acutissima</i>         | Woody species |

| Chinese name | Scientific name                    | Life form         |
|--------------|------------------------------------|-------------------|
| 小叶栎          | <i>Quercus chenii</i>              | Woody species     |
| 白栎           | <i>Quercus fabri</i>               | Woody species     |
| 青冈           | <i>Quercus glauca</i>              | Woody species     |
| 苦栎           | <i>Quercus laevis</i>              | Woody species     |
| 石斑木          | <i>Rhaphiolepis indica</i>         | Woody species     |
| 马银花          | <i>Rhododendron ovatum</i>         | Woody species     |
| 杜鹃花          | <i>Rhododendron simsii</i>         | Woody species     |
| 盐肤木          | <i>Rhus chinensis</i>              | Woody species     |
| 檫木           | <i>Sassafras tzumu</i>             | Woody species     |
| 木荷           | <i>Schima superba</i>              | Woody species     |
| 赛山梅          | <i>Styrax confusus</i>             | Woody species     |
| 薄叶山矾         | <i>Symplocos anomala</i>           | Woody species     |
| 倒披针叶山矾       | <i>Symplocos oblanceolata</i>      | Woody species     |
| 白檀           | <i>Symplocos paniculata</i>        | Woody species     |
| 老鼠矢          | <i>Symplocos stellaris</i>         | Woody species     |
| 山矾           | <i>Symplocos sumuntia</i>          | Woody species     |
| 赤楠           | <i>Syzygium buxifolium</i>         | Woody species     |
| 白花苦灯笼        | <i>Tarenna mollissima</i>          | Woody species     |
| 漆树           | <i>Toxicodendron vernicifluum</i>  | Woody species     |
| 南烛           | <i>Vaccinium bracteatum</i>        | Woody species     |
| 黄背越桔         | <i>Vaccinium iteophyllum</i>       | Woody species     |
| 江南越橘         | <i>Vaccinium mandarinorum</i>      | Woody species     |
| 油桐           | <i>Vernicia fordii</i>             | Woody species     |
| 宜昌荚蒾         | <i>Viburnum erosum</i>             | Woody species     |
| 花椒           | <i>Zanthoxylum bungeanum</i>       | Woody species     |
| 木通           | <i>Akebia quinata</i>              | Non-woody species |
| 山葡萄          | <i>Ampelopsis brevipedunculata</i> | Non-woody species |
| 蛇葡萄          | <i>Ampelopsis sinica</i>           | Non-woody species |
| 紫金牛          | <i>Ardisia japonica</i>            | Non-woody species |
| 勾儿茶          | <i>Berchemia sinica</i> Schneid    | Non-woody species |
| 葡蟠           | <i>Broussonetia kaempferi</i>      | Non-woody species |
| 过山枫          | <i>Celastrus aculeatus</i>         | Non-woody species |
| 单叶双盖蕨        | <i>Deparia lancea</i>              | Non-woody species |
| 芒萁           | <i>Dicranopteris dichotoma</i>     | Non-woody species |
| 里白           | <i>Diplazium glaucum</i>           | Non-woody species |
| 红盖鳞毛蕨        | <i>Dryopteris erythrosora</i>      | Non-woody species |
| 丽江鳞毛蕨        | <i>Dryopteris montigena</i>        | Non-woody species |
| 蛇莓           | <i>Duchesnea indica</i>            | Non-woody species |
| 大吴风草         | <i>Farfugium japonicum</i>         | Non-woody species |

| Chinese name | Scientific name                    | Life form         |
|--------------|------------------------------------|-------------------|
| 绞股蓝          | <i>Gynostemma pentaphyllum</i>     | Non-woody species |
| 箬竹           | <i>Indocalamus tessellatus</i>     | Non-woody species |
| 南五味子         | <i>Kadsura logipedunculata</i>     | Non-woody species |
| 金银花          | <i>Lonicera japonica</i>           | Non-woody species |
| 淡竹叶          | <i>Lophatherum gracile</i>         | Non-woody species |
| 海金沙          | <i>Lygodium japonicum</i>          | Non-woody species |
| 杜茎山          | <i>Maesa japonica</i>              | Non-woody species |
| 沿阶草          | <i>Ophiopogon bodinieri</i>        | Non-woody species |
| 紫萁           | <i>Osmunda japonica</i>            | Non-woody species |
| 鸡矢藤          | <i>Paederia scandens</i>           | Non-woody species |
| Species      | Latin name                         | Life form         |
| 水竹           | <i>Phyllostachys heteroclada</i>   | Non-woody species |
| 菝葜           | <i>Smilax china</i>                | Non-woody species |
| 千金藤          | <i>Stephania japonica</i>          | Non-woody species |
| 络石           | <i>Trachelospermum jasminoides</i> | Non-woody species |
| 油点草          | <i>Tricyrtis macropoda</i>         | Non-woody species |
| 紫藤           | <i>Wisteria sinensis</i>           | Non-woody species |
| 狗脊           | <i>Woodwardia japonica</i>         | Non-woody species |



**Table S2: Results of mixed-effect models showing the effects of habitat disturbance and spatial scale on species and functional diversity relationships for woody, non-woody and woody + non-woody layers. Bold font represents statistical significance ( $\alpha = 0.05$ ).**

| <i>Model relevant to hypotheses</i>                                   |       |       |          |                 | <i>Fitted model</i>                                             |       |       |          |                 |
|-----------------------------------------------------------------------|-------|-------|----------|-----------------|-----------------------------------------------------------------|-------|-------|----------|-----------------|
| (a) Species richness-functional richness relationship in woody layers |       |       |          |                 |                                                                 |       |       |          |                 |
| <i>Fixed effects</i>                                                  | numDF | denDF | F-value  | p-value         | <i>Fixed effects</i>                                            | numDF | denDF | F-value  | p-value         |
| (Intercept)                                                           | 1     | 13    | 1414.192 | < <b>0.0001</b> | (Intercept)                                                     | 1     | 17    | 1982.321 | < <b>0.0001</b> |
| log(richness)                                                         | 1     | 13    | 1020.05  | < <b>0.0001</b> | log(richness)                                                   | 1     | 17    | 1255.07  | < <b>0.0001</b> |
| Disturbance                                                           | 2     | 9     | 32.1886  | <b>0.0001</b>   | Disturbance                                                     | 2     | 9     | 40.4604  | < <b>0.0001</b> |
| Spatial scale                                                         | 2     | 13    | 4.9972   | <b>0.0246</b>   | Spatial scale                                                   | 2     | 17    | 6.5888   | <b>0.0076</b>   |
| log(richness):Disturbance                                             | 2     | 13    | 16.7719  | <b>0.0003</b>   | log(richness):Disturbance                                       | 2     | 17    | 16.843   | <b>0.0001</b>   |
| log(richness):Spatial scale                                           | 2     | 13    | 7.3977   | <b>0.0072</b>   | log(richness):Spatial scale                                     | 2     | 17    | 7.8019   | <b>0.0039</b>   |
| Disturbance:Spatial scale                                             | 4     | 13    | 0.3014   | 0.8719          |                                                                 |       |       |          |                 |
| <i>Random effects (StdDev)</i>                                        |       |       |          |                 | <i>Random effects (StdDev)</i>                                  |       |       |          |                 |
| site: 0.1311205 (intercept)                                           |       |       |          |                 | site: 0.1036881 (intercept)                                     |       |       |          |                 |
| Spatial scale %in% site: 0.121159 (intercept); 0.05260605 (res)       |       |       |          |                 | Spatial scale %in% site: 0.120545 (intercept); 0.04957394 (res) |       |       |          |                 |
| AIC: 25.39789; BIC: 43.94561; logLik: 4.301055                        |       |       |          |                 | AIC: 17.67429; BIC: 34.02954; logLik: 4.162857                  |       |       |          |                 |
| (b) Species evenness-functional evenness relationship in woody layers |       |       |          |                 |                                                                 |       |       |          |                 |
| <i>Fixed effects</i>                                                  | numDF | denDF | F-value  | p-value         | <i>Fixed effects</i>                                            | numDF | denDF | F-value  | p-value         |
| (Intercept)                                                           | 1     | 13    | 423.9203 | < <b>0.0001</b> | (Intercept)                                                     | 1     | 19    | 638.185  | < <b>0.0001</b> |
| log(Evar)                                                             | 1     | 13    | 93.6597  | < <b>0.0001</b> | log(Evar)                                                       | 1     | 19    | 130.897  | < <b>0.0001</b> |

|                                                                 |   |    |        |               |                                                                |   |    |        |               |
|-----------------------------------------------------------------|---|----|--------|---------------|----------------------------------------------------------------|---|----|--------|---------------|
| Disturbance                                                     | 2 | 9  | 0.3175 | 0.7358        | Spatial scale                                                  | 2 | 19 | 0.8746 | 0.4331        |
| Spatial scale                                                   | 2 | 13 | 0.8098 | 0.4662        | log(Evar):Spatial scale                                        | 2 | 19 | 6.233  | <b>0.0083</b> |
| log(Evar):Disturbance                                           | 2 | 13 | 0.7145 | 0.5077        |                                                                |   |    |        |               |
| log(Evar):Spatial scale                                         | 2 | 13 | 6.5433 | <b>0.0108</b> |                                                                |   |    |        |               |
| Disturbance:Spatial scale                                       | 4 | 13 | 0.5794 | 0.6828        |                                                                |   |    |        |               |
| <i>Random effects (StdDev)</i>                                  |   |    |        |               | <i>Random effects (StdDev)</i>                                 |   |    |        |               |
| site: 0.06657712 (intercept)                                    |   |    |        |               | site: 0.0325984 (intercept)                                    |   |    |        |               |
| Spatial scale %in% site: 0.1176006 (intercept); 0.0438779 (res) |   |    |        |               | Spatial scale %in% site: 0.121604 (intercept); 0.0363736 (res) |   |    |        |               |
| AIC: 25.95032; BIC: 44.49804; logLik: 4.024841                  |   |    |        |               | AIC: -2.907229; BIC: 9.703548; logLik: 10.45361                |   |    |        |               |

(c) Species diversity-functional diversity relationship in woody layers

| <i>Fixed effects</i>                                              | numDF | denDF | F-value  | p-value           | <i>Fixed effects</i>                                             | numDF | denDF | F-value  | p-value           |
|-------------------------------------------------------------------|-------|-------|----------|-------------------|------------------------------------------------------------------|-------|-------|----------|-------------------|
| (Intercept)                                                       | 1     | 13    | 80.7735  | <b>&lt;0.0001</b> | (Intercept)                                                      | 1     | 23    | 81.13703 | <b>&lt;0.0001</b> |
| log(Species diversity)                                            | 1     | 13    | 286.0755 | <b>&lt;0.0001</b> | log(Species diversity)                                           | 1     | 23    | 108.8915 | <b>&lt;0.0001</b> |
| Disturbance                                                       | 2     | 9     | 0.65001  | 0.5449            |                                                                  |       |       |          |                   |
| Spatial scale                                                     | 2     | 13    | 36.654   | <b>&lt;0.0001</b> |                                                                  |       |       |          |                   |
| log(Species diversity):Disturbance                                | 2     | 13    | 5.56667  | <b>0.0179</b>     |                                                                  |       |       |          |                   |
| log(Species diversity): Spatial scale                             | 2     | 13    | 4.03662  | <b>0.0433</b>     |                                                                  |       |       |          |                   |
| Disturbance: Spatial scale                                        | 4     | 13    | 1.38476  | 0.2929            |                                                                  |       |       |          |                   |
| <i>Random effects (StdDev)</i>                                    |       |       |          |                   | <i>Random effects (StdDev)</i>                                   |       |       |          |                   |
| site: 0.3599029 (intercept)                                       |       |       |          |                   | site: 0.3510388 (intercept)                                      |       |       |          |                   |
| Spatial scale %in% site: 0.05406032 (intercept); 0.03935568 (res) |       |       |          |                   | Spatial scale %in% site: 0.1274053 (intercept); 0.07337433 (res) |       |       |          |                   |

AIC: 16.24265; BIC: 34.79037; logLik: 8.878677

AIC: 12.48434; 20.11614; logLik: -1.242169

(d) Species richness-functional richness relationship in non-woody layers

| <i>Fixed effects</i>                                             | numDF | denDF | F-value  | p-value           | <i>Fixed effects</i>                                             | numDF | denDF | F-value  | p-value           |
|------------------------------------------------------------------|-------|-------|----------|-------------------|------------------------------------------------------------------|-------|-------|----------|-------------------|
| (Intercept)                                                      | 1     | 13    | 373.7536 | <b>&lt;0.0001</b> | (Intercept)                                                      | 1     | 23    | 515.8541 | <b>&lt;0.0001</b> |
| log(richness)                                                    | 1     | 13    | 436.6051 | <b>&lt;0.0001</b> | log(richness)                                                    | 1     | 23    | 452.9774 | <b>&lt;0.0001</b> |
| Disturbance                                                      | 2     | 9     | 0.1281   | 0.8814            |                                                                  |       |       |          |                   |
| Spatial scale                                                    | 2     | 13    | 0.525    | 0.6036            |                                                                  |       |       |          |                   |
| log(richness): Spatial scale                                     | 2     | 13    | 0.6221   | 0.552             |                                                                  |       |       |          |                   |
| log(richness): Spatial scale                                     | 2     | 13    | 2.0944   | 0.1627            |                                                                  |       |       |          |                   |
| Disturbance: Spatial scale                                       | 4     | 13    | 0.4311   | 0.7838            |                                                                  |       |       |          |                   |
| <i>Random effects (StdDev)</i>                                   |       |       |          |                   | <i>Random effects (StdDev)</i>                                   |       |       |          |                   |
| site: 0.3058164 (intercept)                                      |       |       |          |                   | site: 0.2554895 (intercept)                                      |       |       |          |                   |
| Spatial scale %in% site: 0.1527584 (intercept); 0.07838734 (res) |       |       |          |                   | Spatial scale %in% site: 0.1521594 (intercept); 0.07526573 (res) |       |       |          |                   |
| AIC: 41.19177; BIC: 59.7395; logLik: -3.595887                   |       |       |          |                   | AIC: 13.83727; BIC: 21.46908; logLik: -1.918637                  |       |       |          |                   |

(e) Species evenness-functional evenness relationship in non-woody layers

| <i>Fixed effects</i>       | numDF | denDF | F-value | p-value           | <i>Fixed effects</i> | numDF | denDF | F-value  | p-value           |
|----------------------------|-------|-------|---------|-------------------|----------------------|-------|-------|----------|-------------------|
| (Intercept)                | 1     | 13    | 129.15  | <b>&lt;0.0001</b> | (Intercept)          | 1     | 23    | 126.0473 | <b>&lt;0.0001</b> |
| log(Evar)                  | 1     | 13    | 0.0033  | 0.9551            | log(Evar)            | 1     | 23    | 0.22188  | 0.642             |
| Disturbance                | 2     | 9     | 2.07233 | 0.1819            |                      |       |       |          |                   |
| Spatial scale              | 2     | 13    | 7.79113 | <b>0.006</b>      |                      |       |       |          |                   |
| log(Evar):Disturbance      | 2     | 13    | 1.47053 | 0.2656            |                      |       |       |          |                   |
| log(Evar): Spatial scale   | 2     | 13    | 0.85597 | 0.4475            |                      |       |       |          |                   |
| Disturbance: Spatial scale | 4     | 13    | 3.10082 | 0.0536            |                      |       |       |          |                   |

*Random effects (StdDev)*

site: 0.1962443 (intercept)

Spatial scale %in% site: 0.1997083 (intercept); 0.08477458 (res)

AIC: 49.2826; BIC: 67.83032; logLik: -7.641298

*Random effects (StdDev)*

site: 0.1531631 (intercept)

Spatial scale %in% site: 0.2912275 (intercept); 0.1068549 (res)

AIC: 38.40402; BIC: 46.03582; logLik: -14.20201

(f) Species diversity-functional diversity relationship in non-woody layers

| <i>Fixed effects</i>                  | numDF | denDF | F-value  | p-value           | <i>Fixed effects</i>   | numDF | denDF | F-value  | p-value           |
|---------------------------------------|-------|-------|----------|-------------------|------------------------|-------|-------|----------|-------------------|
| (Intercept)                           | 1     | 13    | 75.51696 | <b>&lt;0.0001</b> | (Intercept)            | 1     | 23    | 90.83944 | <b>&lt;0.0001</b> |
| log(Species diversity)                | 1     | 13    | 144.3509 | <b>&lt;0.0001</b> | log(Species diversity) | 1     | 23    | 143.127  | <b>&lt;0.0001</b> |
| Disturbance                           | 2     | 9     | 0.45626  | 0.6475            |                        |       |       |          |                   |
| Spatial scale                         | 2     | 13    | 1.02649  | 0.3856            |                        |       |       |          |                   |
| log(Species diversity):Disturbance    | 2     | 13    | 0.9193   | 0.4232            |                        |       |       |          |                   |
| log(Species diversity): Spatial scale | 2     | 13    | 2.74641  | 0.1012            |                        |       |       |          |                   |
| Disturbance: Spatial scale            | 4     | 13    | 0.15483  | 0.9574            |                        |       |       |          |                   |

*Random effects (StdDev)*

site: 0.2097169 (intercept)

Spatial scale %in% site: 0.03441179 (intercept); 0.02432411 (res)

AIC: -6.314668; 12.23305; logLik: 20.15733

*Random effects (StdDev)*

site: 0.190901 (intercept)

Spatial scale %in% site: 0.03454414 (intercept); 0.02532032 (res)

AIC: -59.07616; BIC: -51.44436; logLik: 34.53808

(g) Species richness-functional richness relationship in woody and non-woody layers combined

| <i>Fixed effects</i> | numDF | denDF | F-value  | p-value           | <i>Fixed effects</i> | numDF | denDF | F-value  | <b>p-value</b>    |
|----------------------|-------|-------|----------|-------------------|----------------------|-------|-------|----------|-------------------|
| (Intercept)          | 1     | 13    | 647.4161 | <b>&lt;0.0001</b> | (Intercept)          | 1     | 21    | 616.2284 | <b>&lt;0.0001</b> |
| log(richness)        | 1     | 13    | 258.4929 | <b>&lt;0.0001</b> | log(richness)        | 1     | 21    | 270.1342 | <b>&lt;0.0001</b> |

|                                                                  |   |    |        |               |                                                                  |   |    |        |               |
|------------------------------------------------------------------|---|----|--------|---------------|------------------------------------------------------------------|---|----|--------|---------------|
| Disturbance                                                      | 2 | 9  | 5.6448 | <b>0.0258</b> | Disturbance                                                      | 2 | 9  | 5.3819 | <b>0.029</b>  |
| Spatial scale                                                    | 2 | 13 | 0.1644 | 0.8502        | log(S): Disturbance                                              | 2 | 21 | 5.0523 | <b>0.0162</b> |
| log(richness):Disturbance                                        | 2 | 13 | 4.6932 | <b>0.0292</b> |                                                                  |   |    |        |               |
| log(richness): Spatial scale                                     | 2 | 13 | 1.921  | 0.1858        |                                                                  |   |    |        |               |
| Disturbance: Spatial scale                                       | 4 | 13 | 0.8993 | 0.4923        |                                                                  |   |    |        |               |
| <i>Random effects (StdDev)</i>                                   |   |    |        |               | <i>Random effects (StdDev)</i>                                   |   |    |        |               |
| site: 0.1809013 (intercept)                                      |   |    |        |               | site: 0.187327 (intercept)                                       |   |    |        |               |
| Spatial scale %in% site: 0.1336633 (intercept); 0.06126598 (res) |   |    |        |               | Spatial scale %in% site: 0.1298101 (intercept); 0.06110076 (res) |   |    |        |               |
| AIC: 29.58537; BIC: 48.13309; logLik: 2.207314                   |   |    |        |               | AIC: 13.69687; BIC: 26.30765; logLik: 2.151564                   |   |    |        |               |

---

(h) Species evenness-functional evenness relationship in woody and non-woody layers combined

---

| <i>Fixed effects</i>                                             | numDF | denDF | F-value  | p-value           | <i>Fixed effects</i>                                             | numDF | denDF | F-value  | p-value           |
|------------------------------------------------------------------|-------|-------|----------|-------------------|------------------------------------------------------------------|-------|-------|----------|-------------------|
| (Intercept)                                                      | 1     | 13    | 964.2905 | <b>&lt;0.0001</b> | (Intercept)                                                      | 1     | 19    | 724.2672 | <b>&lt;0.0001</b> |
| log(Evar)                                                        | 1     | 13    | 4.6619   | 0.0501            | log(Evar)                                                        | 1     | 19    | 2.3757   | 0.1397            |
| Disturbance                                                      | 2     | 9     | 2.5813   | 0.13              | Spatial scale                                                    | 2     | 19    | 32.4973  | <b>&lt;.0001</b>  |
| Spatial scale                                                    | 2     | 13    | 33.4699  | <b>&lt;0.0001</b> | log(Evar): Spatial scale                                         | 2     | 19    | 7.7021   | <b>0.0036</b>     |
| log(Evar): Disturbance                                           | 2     | 13    | 1.4474   | 0.2707            |                                                                  |       |       |          |                   |
| log(Evar): Spatial scale                                         | 2     | 13    | 7.6      | <b>0.0065</b>     |                                                                  |       |       |          |                   |
| Disturbance: Spatial scale                                       | 4     | 13    | 0.6513   | 0.6361            |                                                                  |       |       |          |                   |
| <i>Random effects (StdDev)</i>                                   |       |       |          |                   | <i>Random effects (StdDev)</i>                                   |       |       |          |                   |
| site: 0.02661224 (intercept)                                     |       |       |          |                   | site: 0.04831632 (intercept)                                     |       |       |          |                   |
| Spatial scale %in% site: 0.1081581 (intercept); 0.03059314 (res) |       |       |          |                   | Spatial scale %in% site: 0.1060043 (intercept); 0.03754336 (res) |       |       |          |                   |
| AIC: 14.34219; BIC: 32.88991; logLik: 9.828905                   |       |       |          |                   | AIC: -10.29944; BIC: 2.311338; logLik: 14.14972                  |       |       |          |                   |

---

(i) Species diversity-functional diversity relationship in woody and non-woody layers combined

---

| <i>Fixed effects</i>                                              | numDF | denDF | F-value  | p-value           | <i>Fixed effects</i>                                             | numDF | denDF | F-value  | p-value           |
|-------------------------------------------------------------------|-------|-------|----------|-------------------|------------------------------------------------------------------|-------|-------|----------|-------------------|
| (Intercept)                                                       | 1     | 13    | 329.4658 | <b>&lt;0.0001</b> | (Intercept)                                                      | 1     | 19    | 372.0936 | <b>&lt;0.0001</b> |
| log(Species diversity)                                            | 1     | 13    | 135.9715 | <b>&lt;0.0001</b> | log(Species diversity)                                           | 1     | 19    | 117.4201 | <b>&lt;0.0001</b> |
| Disturbance                                                       | 2     | 9     | 3.7399   | 0.0657            | Spatial scale                                                    | 2     | 19    | 4.5029   | <b>0.0251</b>     |
| Spatial scale                                                     | 2     | 13    | 2.4623   | 0.1239            | log(Species diversity):<br>Spatial scale                         | 2     | 19    | 4.0223   | <b>0.0349</b>     |
| log(Species<br>diversity):Disturbance                             | 2     | 13    | 2.1254   | 0.159             |                                                                  |       |       |          |                   |
| log(Species diversity):Spatial<br>scale                           | 2     | 13    | 6.1319   | <b>0.0133</b>     |                                                                  |       |       |          |                   |
| Disturbance:Spatial scale                                         | 4     | 13    | 0.4001   | 0.8052            |                                                                  |       |       |          |                   |
| <i>Random effects (StdDev)</i>                                    |       |       |          |                   | <i>Random effects (StdDev)</i>                                   |       |       |          |                   |
| site: 0.1891207 (intercept)                                       |       |       |          |                   | site: 0.1775943 (intercept)                                      |       |       |          |                   |
| Spatial scale %in% site: 0.02747623 (intercept); 0.01954483 (res) |       |       |          |                   | Spatial scale %in% site: 0.0300881 (intercept); 0.02212692 (res) |       |       |          |                   |
| AIC: -17.30541; BIC: 1.242307; logLik: 25.65271                   |       |       |          |                   | AIC: -43.35325; BIC: -30.74248; logLik: 30.67663                 |       |       |          |                   |
